# Supplementary material
Source: MDPI journal article supplement (https://www.mdpi.com/2076-3417/13/3/1564)
Supplement: s1 [file s1]

**Table S1. Predictor Characteristics in population B**

| Predictors                         | Overall,<br>n=30043 | No Delirium,<br>n=26075 | Delirium,<br>n=3968 | P value | % Missing |
|------------------------------------|---------------------|-------------------------|---------------------|---------|-----------|
| <b>Predisposing risk factors</b>   |                     |                         |                     |         |           |
| Age, year                          | 77.0 (66.0-86.0)    | 76.0 (65.0-85.0)        | 84.0 (75.0-89.0)    | <0.001  | 0.0       |
| Men                                | 16883 (56.2)        | 14849 (56.9)            | 2034 (51.3)         | <0.001  | 0.0       |
| Body mass index, kg/m <sup>2</sup> | 21.8 (19.3-24.5)    | 22.0 (19.5-24.7)        | 20.5 (18.1-23.2)    | <0.001  | 1.8       |
| Take of benzodiazepine medications | 649 (2.2)           | 503 (2.0)               | 146 (3.8)           | <0.001  | 3.0       |
| Take of opioid medications         | 601 (2.1)           | 434 (1.7)               | 167 (4.3)           | <0.001  | 3.0       |
| Take of steroid medications        | 1099 (3.8)          | 873 (3.5)               | 226 (5.8)           | <0.001  | 3.0       |
| Dementia                           | 4425 (15.2)         | 3041 (12.0)             | 1384 (35.6)         | <0.001  | 3.0       |
| Brain tissue disorder              | 5505 (18.9)         | 4497 (17.8)             | 1008 (25.9)         | <0.001  | 3.0       |
| Heavy drinker                      | 755 (2.6)           | 586 (2.3)               | 169 (4.3)           | <0.001  | 3.0       |
| History of delirium                | 1022 (3.5)          | 580 (2.3)               | 442 (11.4)          | <0.001  | 3.0       |
| <b>Use of ambulance</b>            | 19172 (63.8)        | 15932 (61.1)            | 3240 (81.7)         | <0.001  | 0.0       |
| <b>Room at hospitalization</b>     |                     |                         |                     | <0.001  | 0.0       |
| Bay of general ward                | 4192 (14.0)         | 3881 (14.9)             | 311 (7.8)           |         |           |
| Intensive care unit                | 11968 (39.8)        | 9420 (36.1)             | 2548 (64.2)         |         |           |
| Private room of general ward       | 13883 (46.2)        | 12774 (49.0)            | 1109 (27.9)         |         |           |
| <b>Schedule of treatment</b>       |                     |                         |                     | <0.001  | 0.0       |
| Catheterization                    | 1866 (6.2)          | 1622 (6.2)              | 244 (6.1)           |         |           |
| Endoscopic treatment               | 2718 (9.0)          | 2491 (9.6)              | 227 (5.7)           |         |           |
| Preserved treatment                | 17264 (57.5)        | 15187 (58.2)            | 2077 (52.3)         |         |           |
| Surgery                            | 8195 (27.3)         | 6775 (26.0)             | 1420 (35.8)         |         |           |
| <b>Vital sign</b>                  |                     |                         |                     |         |           |
| Systolic blood pressure, mmHg      | 135 (117-156)       | 136 (117-156)           | 133 (113-155)       | <0.001  | 0.2       |
| Diastolic blood pressure, mmHg     | 78 (66-90)          | 78 (67-90)              | 76 (64-89)          | <0.001  | 0.2       |

|                                               |                  |                  |                  |        |      |
|-----------------------------------------------|------------------|------------------|------------------|--------|------|
| Pulse rate, times/minute                      | 82 (70-96)       | 82 (70-95)       | 85 (73-100)      | <0.001 | 1.9  |
| SpO <sub>2</sub> , %                          | 97 (95-98)       | 97 (95-98)       | 96 (95-98)       | <0.001 | 1.1  |
| Respiratory rate, times/minute                | 18 (16-21)       | 18 (16-21)       | 19 (16-23)       | <0.001 | 0.9  |
| Body temperature, °C                          | 36.7 (36.4-37.2) | 36.7 (36.4-37.2) | 36.8 (36.4-37.3) | <0.001 | 0.1  |
| Glasgow Coma Scale                            | 15 (14-15)       | 15 (14-15)       | 14 (12-15)       | <0.001 | 37.1 |
| <b>Laboratory data</b>                        |                  |                  |                  |        |      |
| Sodium, mmol/L                                | 139 (137-140)    | 139 (137-141)    | 139 (136-141)    | <0.001 | 0.4  |
| Potassium, mmol/L                             | 4.03 (3.69-4.40) | 4.03 (3.70-4.39) | 4.03 (3.62-4.45) | 0.26   | 0.4  |
| Chloride, mmol/L                              | 104 (101-106)    | 104 (101-106)    | 103 (100-106)    | <0.001 | 0.4  |
| Total protein, g/dL                           | 6.8 (6.3-7.2)    | 6.8 (6.3-7.2)    | 6.6 (6.0-7.1)    | <0.001 | 0.8  |
| Albumin, g/dL                                 | 3.6 (3.2-4.1)    | 3.7 (3.2-4.1)    | 3.4 (2.9-3.8)    | <0.001 | 0.8  |
| Albumin/globulin ratio                        | 1.19 (0.97-1.42) | 1.21 (0.97-1.43) | 1.09 (0.88-1.31) | <0.001 | 0.8  |
| Blood urea nitrogen, mg/dL                    | 18.7 (14.0-27.0) | 18.3 (13.8-26.2) | 21.8 (15.9-32.9) | <0.001 | 0.4  |
| Creatinine, mg/dL                             | 0.87 (0.68-1.22) | 0.87 (0.68-1.20) | 0.95 (0.70-1.41) | <0.001 | 0.4  |
| Aspartate aminotransferase, IU/L              | 24 (18-36)       | 24 (18-35)       | 25 (19-39)       | <0.001 | 0.4  |
| Alanine transaminase, IU/L                    | 18 (12-30)       | 18 (12-30)       | 17 (11-27)       | <0.001 | 0.4  |
| γ-glutamyltranspeptidase, IU/L                | 28 (16-62)       | 29 (17-63)       | 24 (14-49)       | <0.001 | 7.2  |
| Lactate dehydrogenase, IU/L                   | 216 (178-271)    | 213 (176-266)    | 236 (195-299)    | <0.001 | 0.6  |
| Total bilirubin, mg/dL                        | 0.80 (0.60-1.10) | 0.80 (0.60-1.10) | 0.80 (0.60-1.10) | 0.37   | 0.6  |
| Glucose, mg/dL                                | 128 (108-162)    | 127 (108-161)    | 134 (110-171)    | <0.001 | 2.6  |
| White blood cells, 10 <sup>3</sup> /μL        | 8.2 (6.1-11.3)   | 8.1 (6.1-11.1)   | 8.8 (6.4-12.3)   | <0.001 | 0.4  |
| Red blood cells, 10 <sup>6</sup> /μL          | 4.0 (3.5-4.5)    | 4.1 (3.5-4.6)    | 3.8 (3.3-4.3)    | <0.001 | 0.4  |
| Hemoglobin, g/dL                              | 12.4 (10.7-13.9) | 12.5 (10.8-14.0) | 11.7 (10.2-13.3) | <0.001 | 0.4  |
| Hematocrit, %                                 | 37.4 (32.6-41.6) | 37.7 (32.9-41.8) | 35.6 (31.0-40.0) | <0.001 | 0.4  |
| Mean Corpuscular Volume, μm <sup>3</sup>      | 92.7 (89.0-96.6) | 92.6 (88.9-96.5) | 93.5 (89.8-97.5) | <0.001 | 0.4  |
| Blood platelet count, x10 <sup>3</sup> /μL    | 20 (16-25)       | 20 (16-25)       | 19 (15-24)       | <0.001 | 0.4  |
| C-reactive protein, mg/dL                     | 0.64 (0.11-4.72) | 0.58 (0.10-4.46) | 1.25 (0.18-6.52) | <0.001 | 3.0  |
| Activated partial thromboplastin time, second | 30.1 (26.6-35.7) | 29.9 (26.5-35.4) | 31.3 (27.2-37.6) | <0.001 | 3.7  |
| Prothrombin time, second                      | 12.6 (11.6-14.2) | 12.6 (11.6-14.0) | 13.1 (11.9-15.3) | <0.001 | 3.4  |

|                                                 |                  |                  |                  |        |     |
|-------------------------------------------------|------------------|------------------|------------------|--------|-----|
| Prothrombin time-international normalized ratio | 1.02 (0.95-1.15) | 1.02 (0.94-1.13) | 1.06 (0.97-1.24) | <0.001 | 3.4 |
|-------------------------------------------------|------------------|------------------|------------------|--------|-----|

Data are expressed as median (interquartile range), number (%).
