# Supplementary material
Source: MDPI journal article supplement (https://www.mdpi.com/2076-3417/13/3/1564)
Supplement: s1 [file s1 › Table S2.pdf]

**Table S2. Predictor Characteristics in analysis population C**

| Predictors                            | Overall,<br>n=4293 | No Delirium,<br>n=4087 | Delirium,<br>n=206 | P value | % Missing |
|---------------------------------------|--------------------|------------------------|--------------------|---------|-----------|
| <b>Predisposing risk factors</b>      |                    |                        |                    |         |           |
| Age, year                             | 71.0 (63.0-77.0)   | 70.0 (62.0-77.0)       | 77.0 (71.0-83.0)   | <0.001  | 0.0       |
| Body mass index, kg/m <sup>2</sup>    | 23.1 (20.8-25.5)   | 23.1 (20.8-25.6)       | 22.0 (19.9-24.1)   | <0.001  | 0.0       |
| Men                                   | 2491 (58.0)        | 2349 (57.5)            | 142 (68.9)         | 0.001   | 0.0       |
| Take of benzodiazepine medications    | 70 (1.7)           | 61 (1.6)               | 9 (4.5)            | 0.005   | 5.5       |
| Take of opioid medications            | 23 (0.6)           | 16 (0.4)               | 7 (3.5)            | <0.001  | 5.5       |
| Take of steroid medications           | 35 (0.9)           | 28 (0.7)               | 7 (3.5)            | <0.001  | 5.5       |
| Dementia                              | 98 (2.4)           | 81 (2.1)               | 17 (8.5)           | <0.001  | 5.5       |
| Brain tissue disorder                 | 402 (9.9)          | 375 (9.7)              | 27 (13.4)          | 0.111   | 5.5       |
| Heavy drinker                         | 17 (0.4)           | 15 (0.4)               | 2 (1.0)            | 0.205   | 5.5       |
| History of delirium                   | 62 (1.5)           | 45 (1.2)               | 17 (8.5)           | <0.001  | 5.5       |
| <b>Room at hospitalization</b>        |                    |                        |                    | 0.07    | 0.0       |
| Bay of general ward                   | 1825 (42.5)        | 1722 (42.1)            | 103 (50.0)         |         |           |
| Intensive care unit                   | 4 (0.1)            | 4 (0.1)                | 0 (0.0)            |         |           |
| Private room of general ward          | 2464 (57.4)        | 2361 (57.8)            | 103 (50.0)         |         |           |
| <b>Pre-operative factors</b>          |                    |                        |                    |         |           |
| Numerical Rating Scale-MAX            | 0 (0-0)            | 0 (0-0)                | 0 (0-0)            | 0.818   | 0.4       |
| Circadian rhythm problems             | 5 (0.1)            | 3 (0.1)                | 2 (1.0)            | 0.021   | 0.0       |
| Physical restraints                   | 10 (0.2)           | 9 (0.2)                | 1 (0.5)            | 0.389   | 0.0       |
| Peripheral vein catheter insertion    | 1745 (40.6)        | 1644 (40.2)            | 101 (49.0)         | 0.015   | 0.0       |
| Central venous catheter insertion     | 295 (6.9)          | 266 (6.5)              | 29 (14.1)          | <0.001  | 0.0       |
| Indwelling urinary catheter insertion | 1424 (33.2)        | 1336 (32.7)            | 88 (42.7)          | 0.004   | 0.0       |
| Ventilator fitted                     | 4049 (94.3)        | 3866 (94.6)            | 183 (88.8)         | 0.001   | 0.0       |
| Central venous port insertion         | 18 (0.4)           | 16 (0.4)               | 2 (1.0)            | 0.213   | 0.0       |

**Surgery-related factors**

|                                      |               |               |               |        |     |
|--------------------------------------|---------------|---------------|---------------|--------|-----|
| Anesthesia time, minute              | 262 (174-360) | 259 (173-355) | 355 (204-488) | <0.001 | 0.0 |
| Amount of blood loss, ml             | 50 (5-235)    | 40 (5-210)    | 190 (10-913)  | <0.001 | 0.3 |
| Surgery site                         |               |               |               | <0.001 | 0.0 |
| Cerebral nerves and cerebrovascular  | 556 (13.0)    | 525 (12.8)    | 31 (15.0)     |        |     |
| Chest wall, abdominal wall, perineum | 71 (1.7)      | 68 (1.7)      | 3 (1.5)       |        |     |
| Head, neck, and throat               | 11 (0.3)      | 11 (0.3)      | 0 (0.0)       |        |     |
| Heart and vascular                   | 670 (15.6)    | 604 (14.8)    | 66 (32.0)     |        |     |
| Hip joints and extremities           | 552 (12.9)    | 531 (13.0)    | 21 (10.2)     |        |     |
| Lower abdominal viscera              | 851 (19.8)    | 828 (20.3)    | 23 (11.2)     |        |     |
| Thoracic and abdominal               | 11 (0.3)      | 10 (0.2)      | 1 (0.5)       |        |     |
| Thoracic cavity and mediastinum      | 578 (13.5)    | 573 (14.0)    | 5 (2.4)       |        |     |
| Upper abdominal viscera              | 988 (23.0)    | 932 (22.8)    | 56 (27.2)     |        |     |
| Other                                | 5 (0.1)       | 5 (0.1)       | 0 (0.0)       |        |     |
| ASA physical status Class            |               |               |               | <0.001 | 0.5 |
| 1                                    | 332 (7.8)     | 331 (8.1)     | 1 (0.5)       |        |     |
| 2                                    | 2889 (67.6)   | 2793 (68.7)   | 96 (46.8)     |        |     |
| 3                                    | 996 (23.3)    | 895 (22.0)    | 101 (49.3)    |        |     |
| 4                                    | 52 (1.2)      | 46 (1.1)      | 6 (2.9)       |        |     |
| 5                                    | 3 (0.1)       | 2 (0.0)       | 1 (0.5)       |        |     |

---

Data are expressed as median (interquartile range), number (%).
